# Supplementary material for: The effects of ankle stiffness on mechanics and energetics of walking with added loads: a prosthetic emulator study
Source: Springer Nature journal article supplement (doi:10.1186/s12984-019-0621-x), 2019-11-21

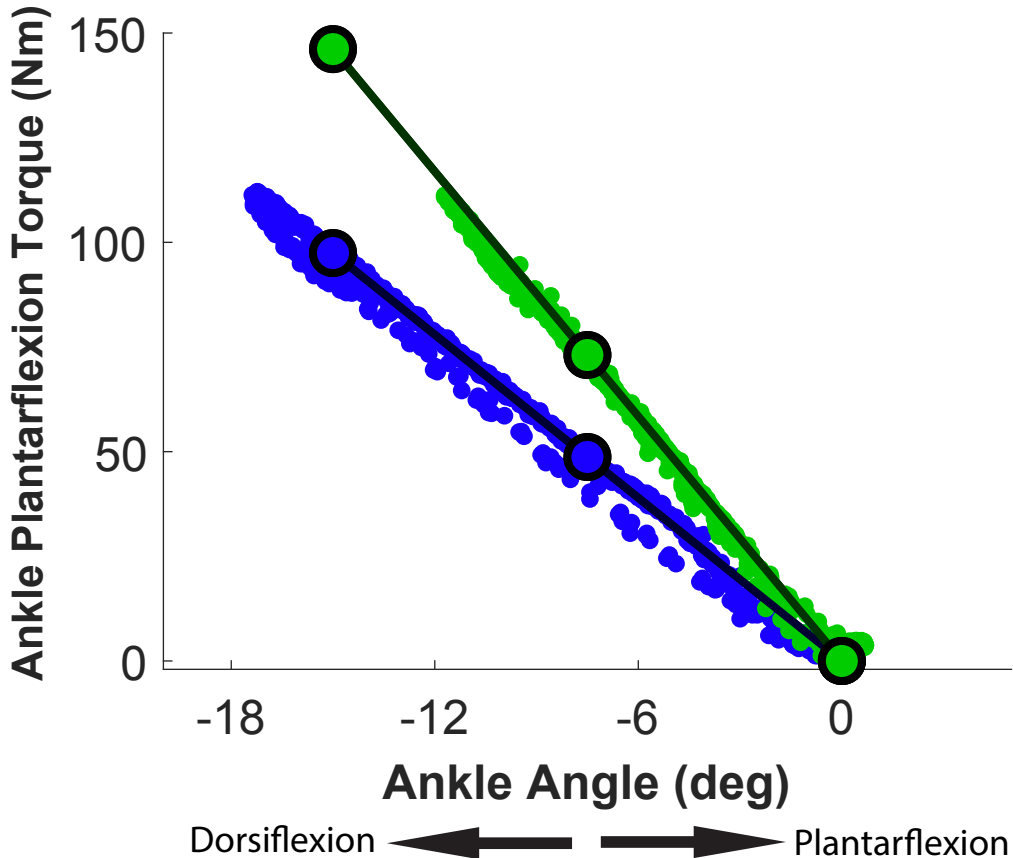

Supplement: MOESM1 [file 17415892]
