# Supplementary material for: The effects of ankle stiffness on mechanics and energetics of walking with added loads: a prosthetic emulator study
Source: Springer Nature journal article supplement (doi:10.1186/s12984-019-0621-x), 2019-11-21
Supplement: MOESM7 [file 17415892]

# Hip

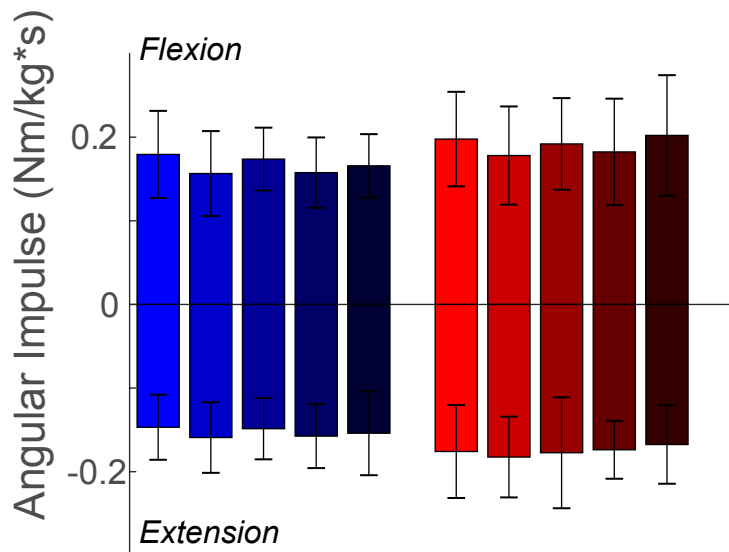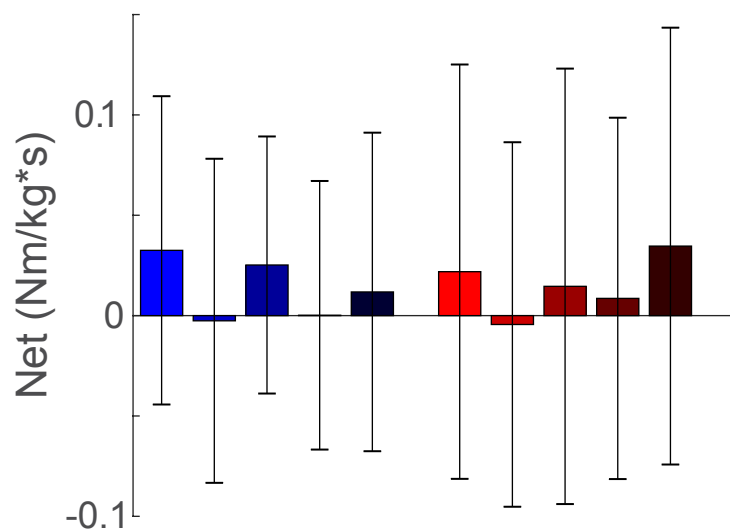

# Knee

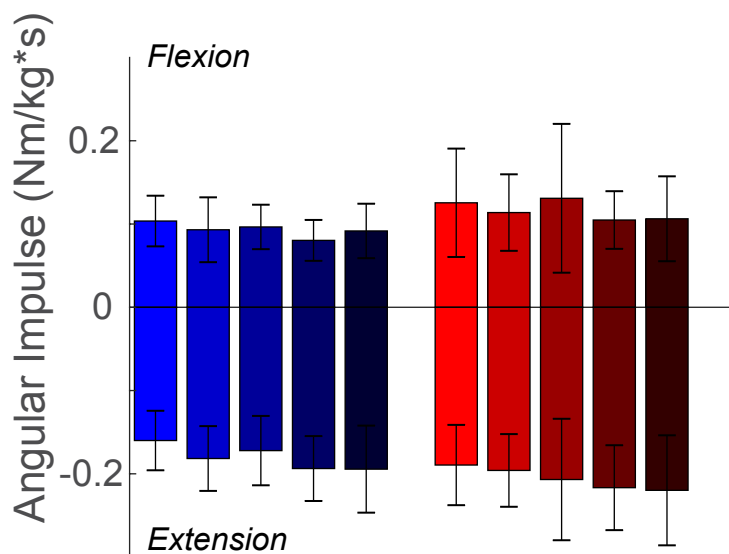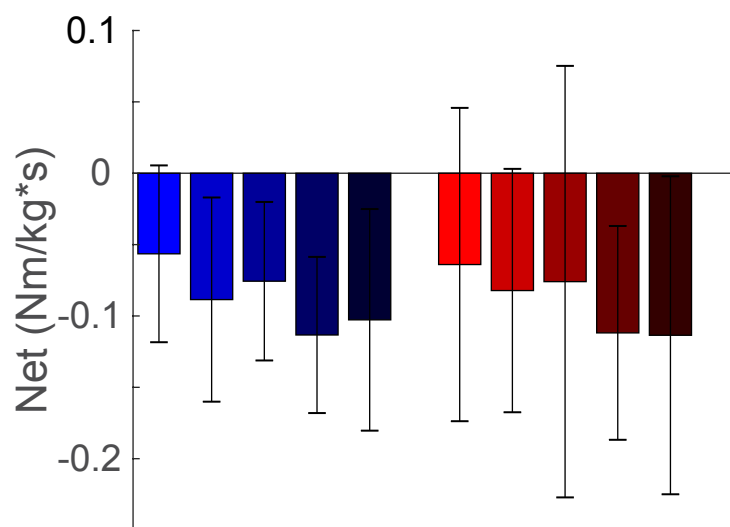

# Ankle

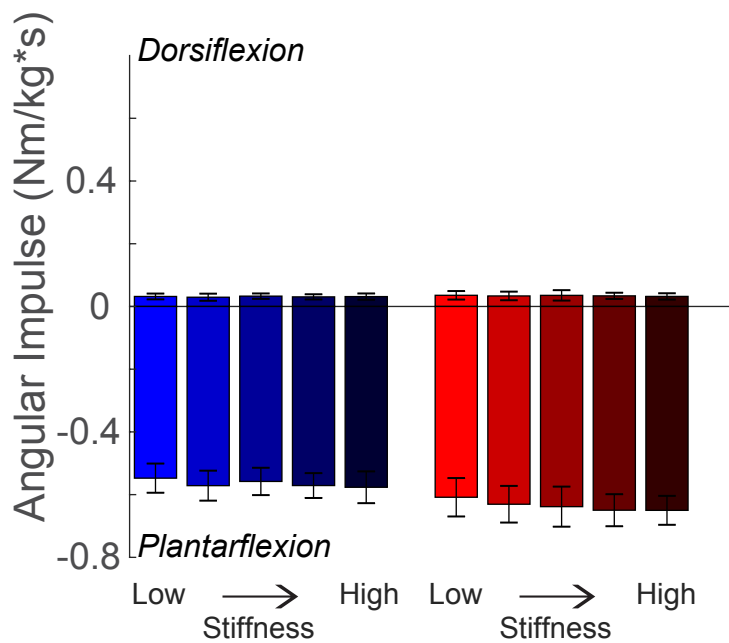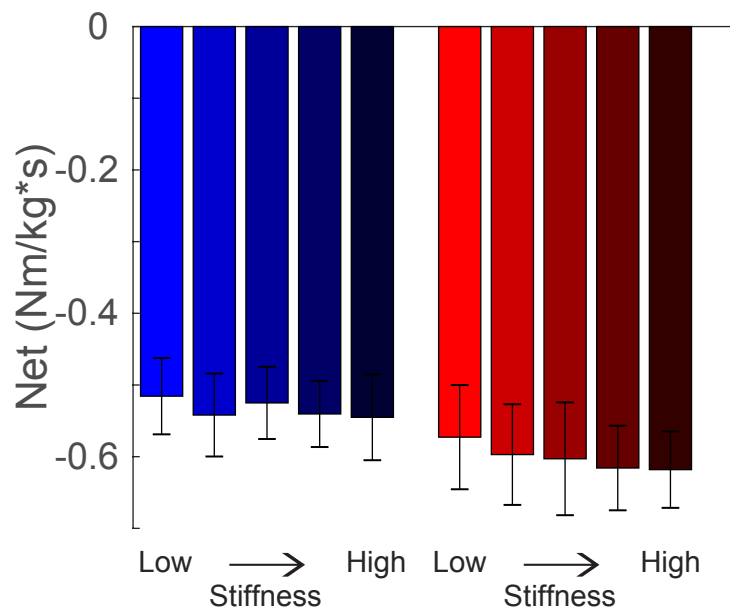

No Additional Load

Additional Load

No Additional Load

Additional Load
