# Supplementary material for: The effects of ankle stiffness on mechanics and energetics of walking with added loads: a prosthetic emulator study
Source: Springer Nature journal article supplement (doi:10.1186/s12984-019-0621-x), 2019-11-21
Supplement: MOESM8 [file 17415892]

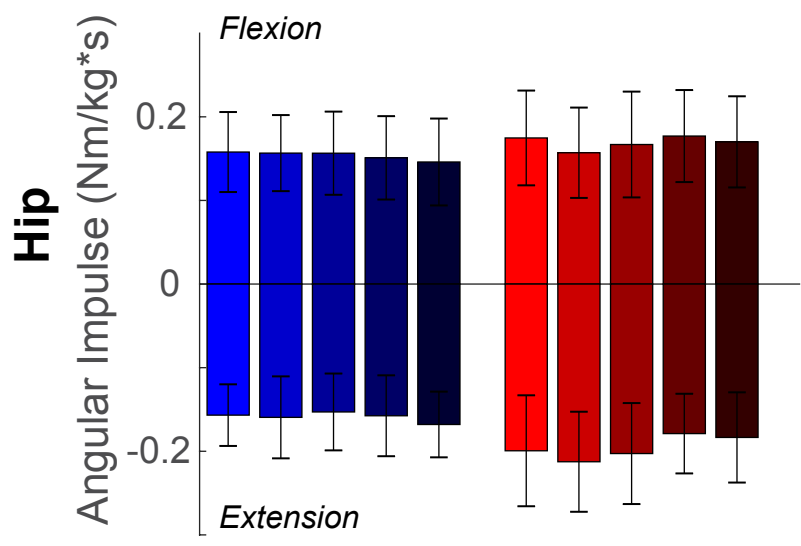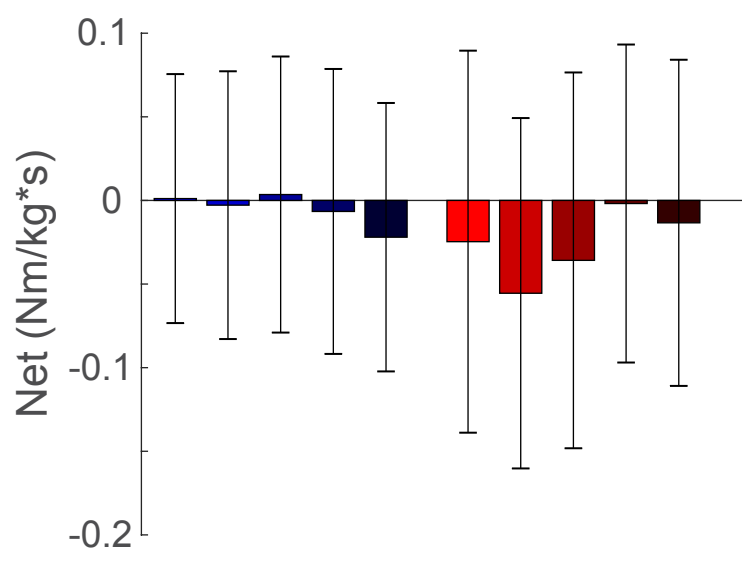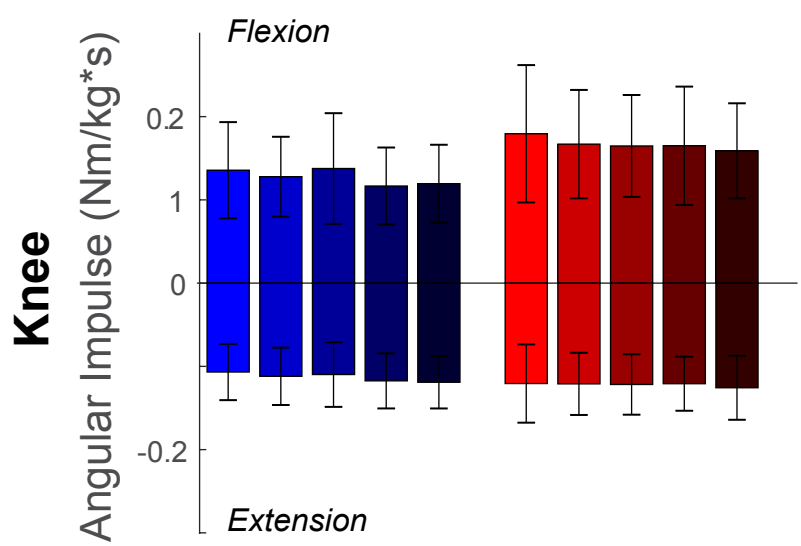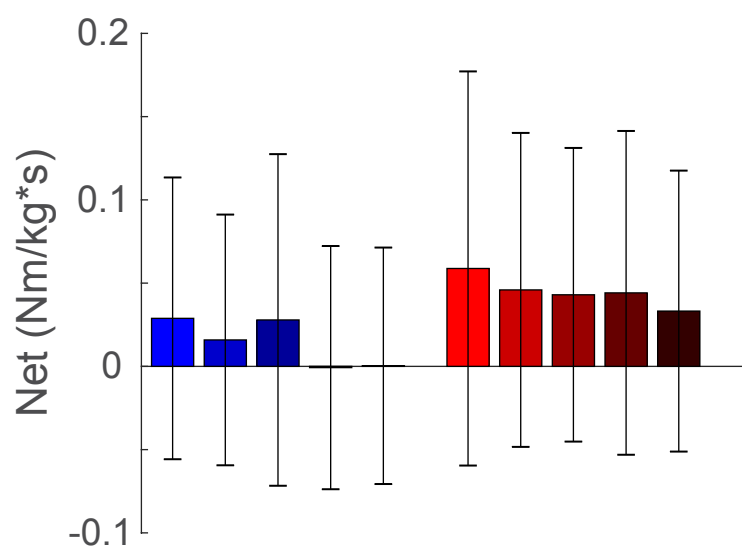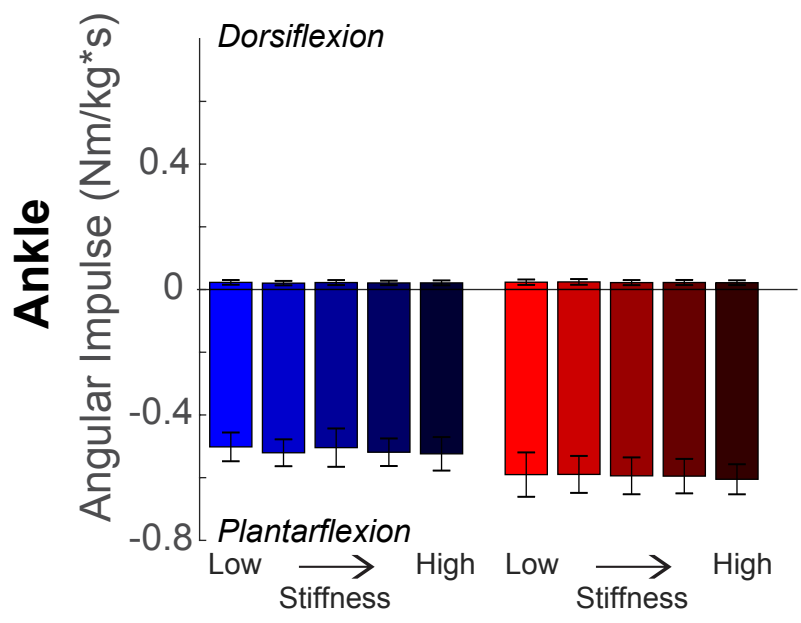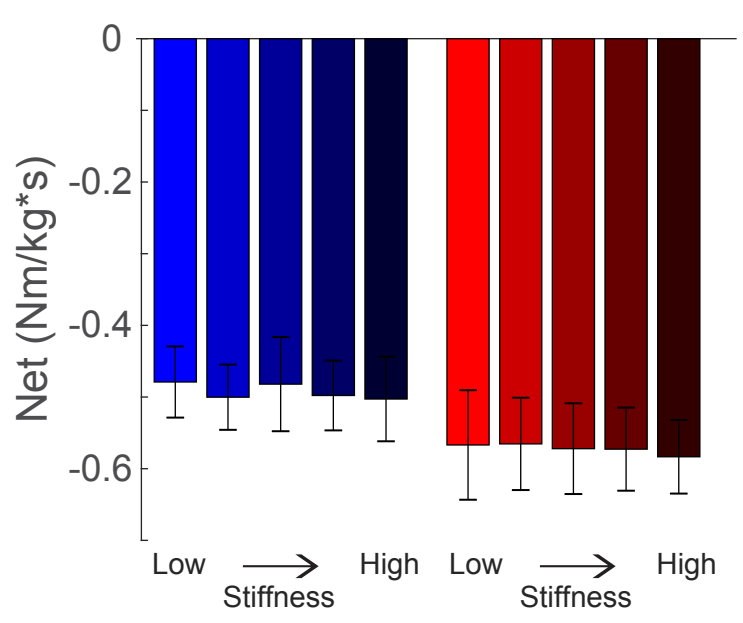

No Additional Load      Additional Load

No Additional Load      Additional Load
