# Supplementary material for: The effects of ankle stiffness on mechanics and energetics of walking with added loads: a prosthetic emulator study
Source: Springer Nature journal article supplement (doi:10.1186/s12984-019-0621-x), 2019-11-21

## No Additional Load

## Additional Load

Low  
Stiffness

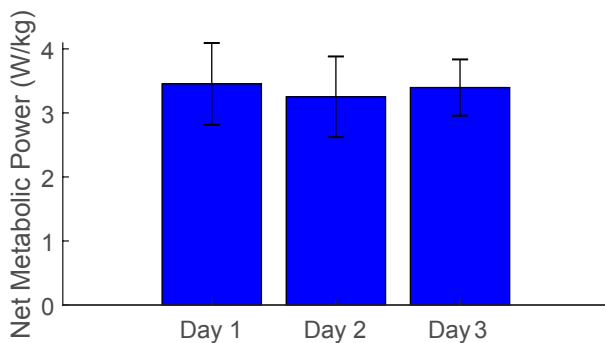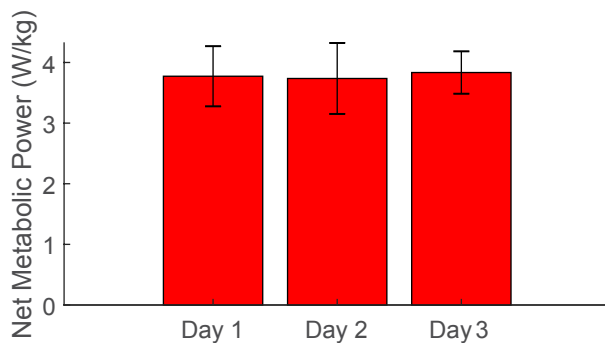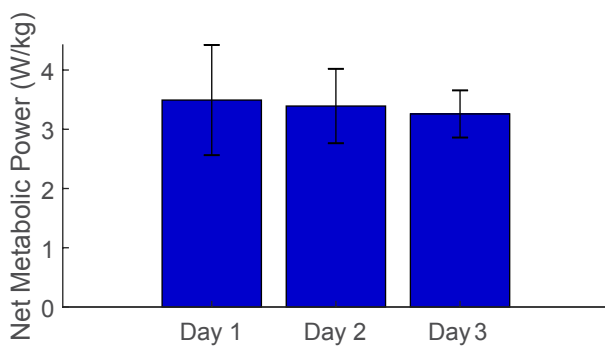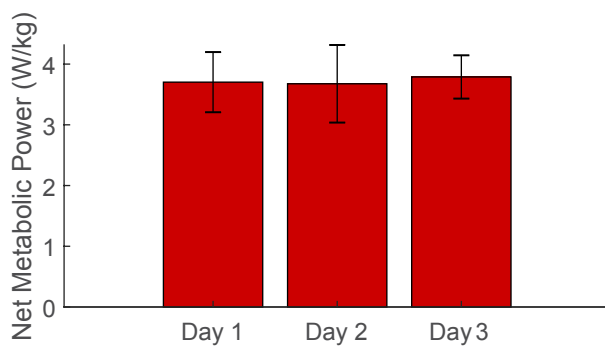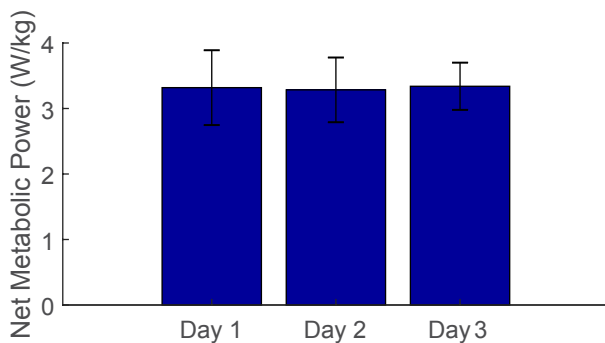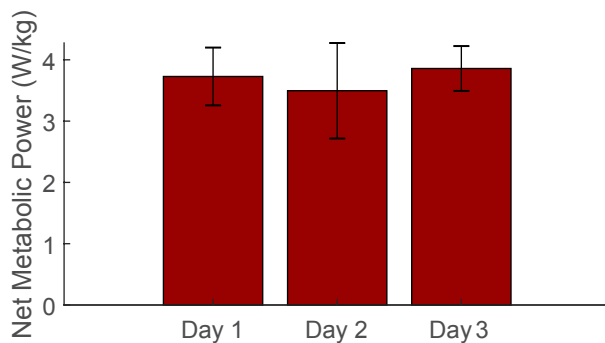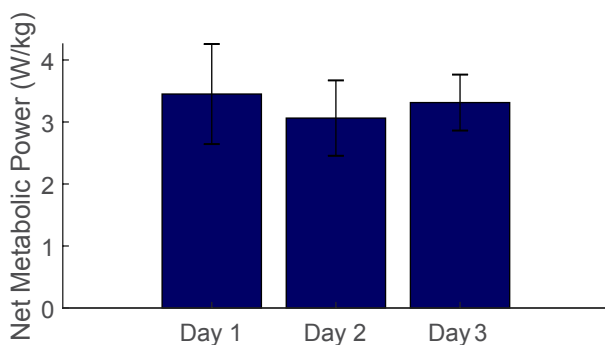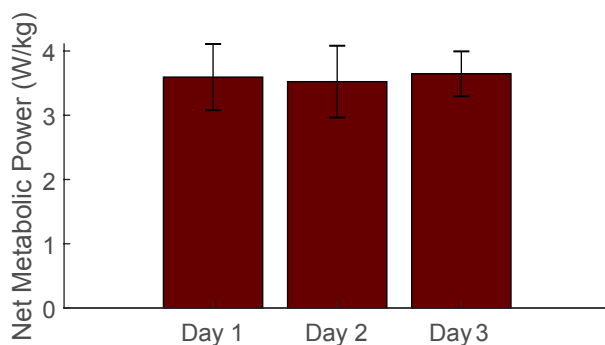

High  
Stiffness

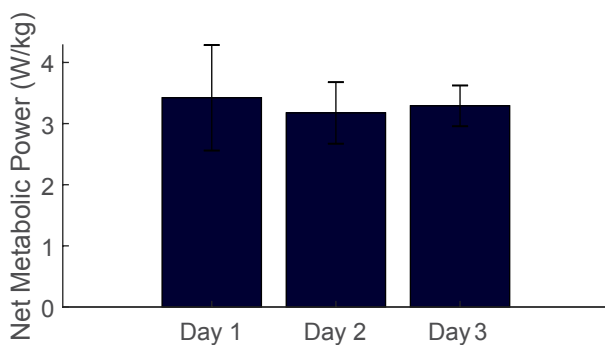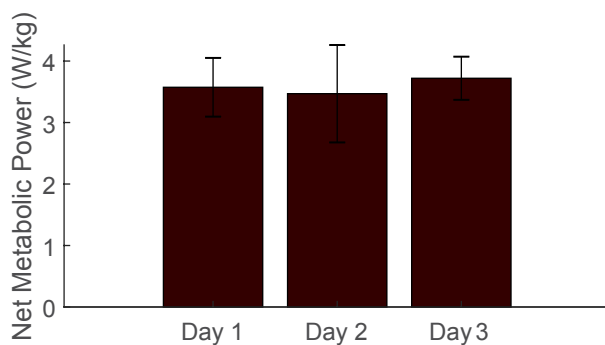

Supplement: MOESM10 [file 17415892]
